# Supplementary material for: Orange-fluorescence carbon dots employed for the quantitative analysis of silver ions and glyphosine through the off–on mode
Source: Royal Society of Chemistry journal article supplement (doi:10.1039/d2ay01458k), 2022-01-01
Supplement: d2ay01458k1.pdf [file d2ay01458k1.pdf]

## Electronic Supplementary Information

### Orange-fluorescence carbon dots employed for the quantitative analysis of silver ion and glyphosine through the off-on mode

Lu Zhao<sup>a</sup>, Yunfeng Bai<sup>a</sup>, Yaqiong Wen<sup>a,\*</sup>, Xiaoming Yang<sup>b,\*</sup>

<sup>a</sup>College of Chemistry and Chemical Engineering, Shanxi Datong University, Datong  
037009, China

<sup>b</sup>College of Pharmaceutical Sciences, Southwest University, Chongqing 400715,  
China

#### 1. Figures:

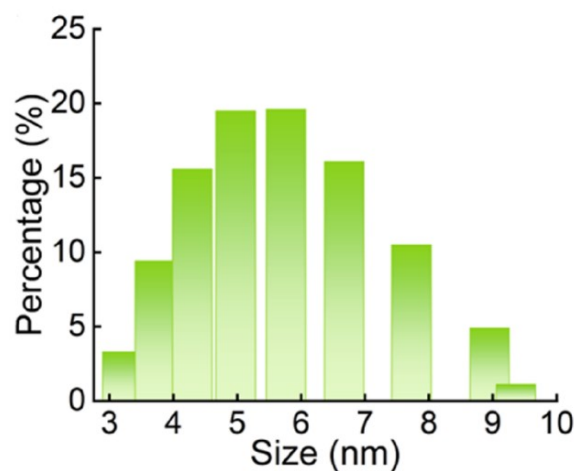

**Figure S1.** DLS analysis of CDs.

---

\* Corresponding authors. E-mail: B070587@163.com

\* Corresponding authors. E-mail: ming4444@swu.edu.cn

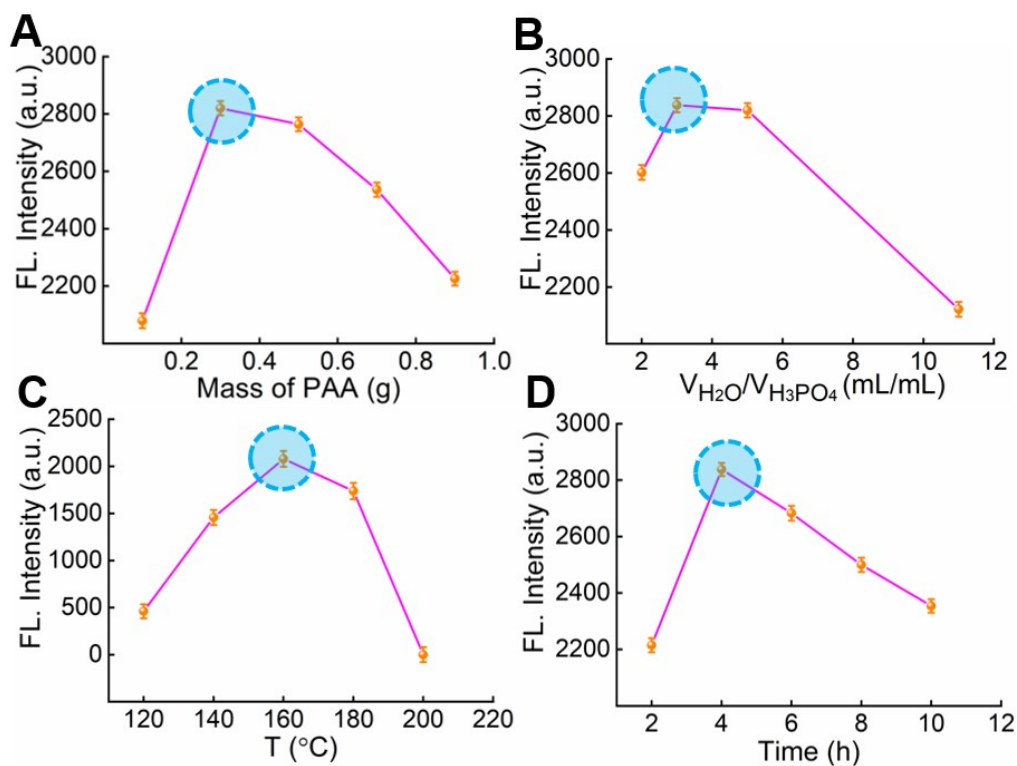

**Figure S2.** Fluorescence intensity of CDs with different mass of PAA (A), varying ratio of  $H_2O_2$  to  $H_3PO_4$ , (B), various reaction temperature (C) and time (D) during the synthesis procedure.

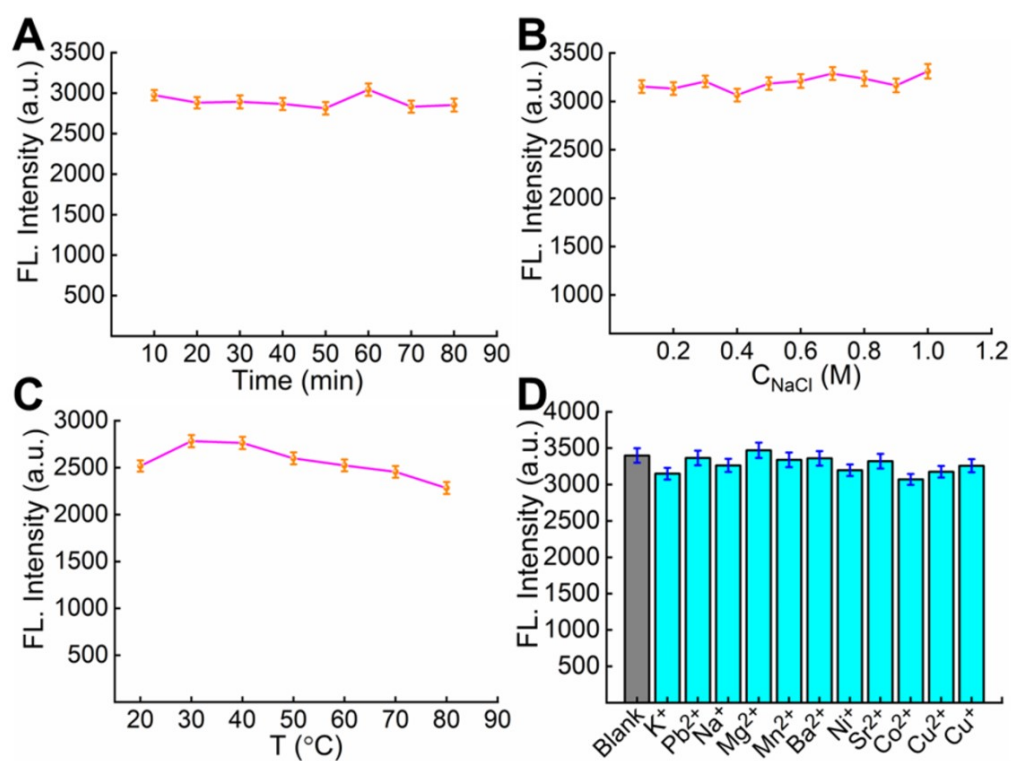

**Figure S3.** Fluorescence intensity of the CDs prepared here towards different time (A), diverse concentrations of NaCl, (B), varying temperature (C) and ions (D).

## 2. Tables:

**Table S1.** Application of CDs detecting silver ion

| Samples | Spiked<br>(10 <sup>-5</sup> M) | Found<br>(10 <sup>-5</sup> M) | Recovery<br>ratio % | RSD (n=3, %) |
|---------|--------------------------------|-------------------------------|---------------------|--------------|
| 1       | 1.00                           | 1.072                         | 107.20              | 4.6          |
| 2       | 1.00                           | 0.953                         | 95.30               | 4.2          |
| 3       | 1.00                           | 0.937                         | 93.70               | 5.0          |

**Table S2.** Application of CDs detecting glyphosine

| Samples | Spiked<br>(10 <sup>-5</sup> M) | Found<br>(10 <sup>-5</sup> M) | Recovery<br>ratio% | RSD (n=3, %) |
|---------|--------------------------------|-------------------------------|--------------------|--------------|
| 1       | 1.00                           | 1.123                         | 112.30             | 4.2          |
| 2       | 1.00                           | 1.045                         | 104.50             | 3.9          |
| 3       | 1.00                           | 0.966                         | 96.60              | 4.7          |
